# Supplementary material for: Primary EBV Infection Induces an Expression Profile Distinct from Other Viruses but Similar to Hemophagocytic Syndromes
Source: PubMed Central journal article supplement (PMC3894977; doi:10.1371/journal.pone.0085422), 2014-01-17
Supplement: pone.0085422.s002.pdf [file pone.0085422.s002.pdf]

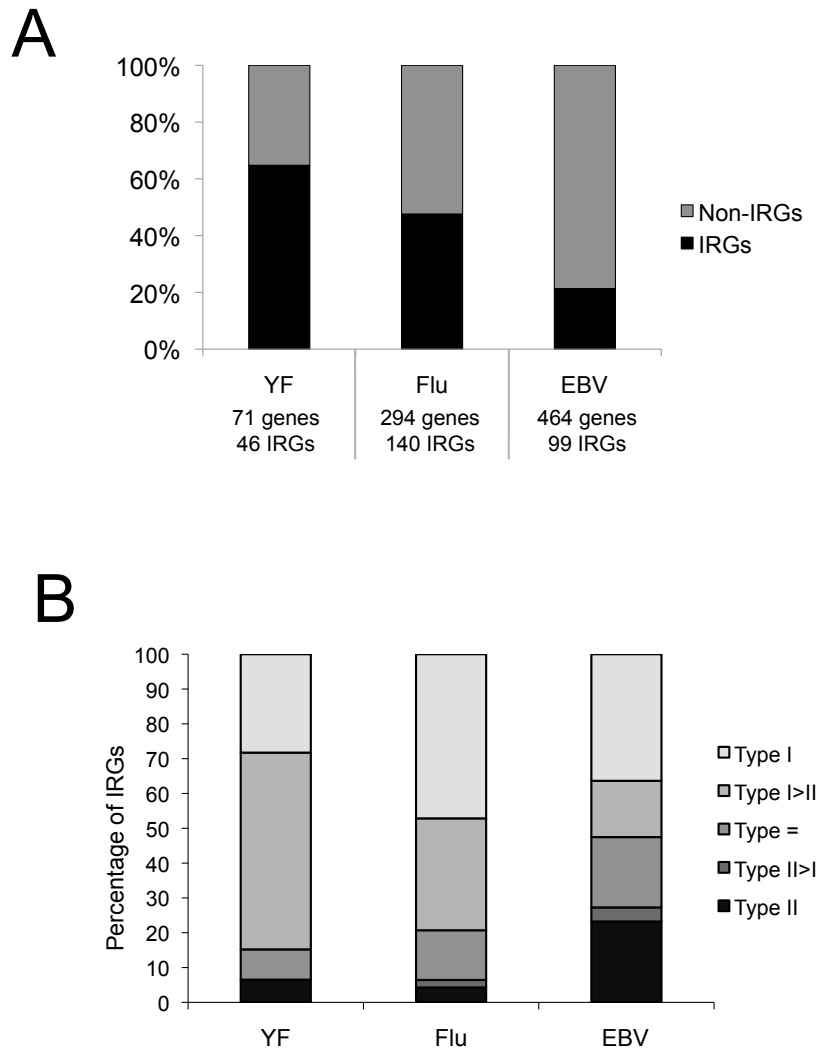

**Figure S2: EBV demonstrates a bias toward a type II IRG expression pattern**

(A) Genes upregulated during acute viral infection were divided into IRG and non-IRG subsets. The number of genes that changed significantly are listed for each infection. The proportion of IRG and non-IRG are shown in the bar graph. (B) Only genes classified as IRG were used for this analysis. IRGs were separated into groupings based on relative upregulation by type I and type II IFN in PBMC stimulated with IFN *in vitro*.
