# Supplementary material for: Primary EBV Infection Induces an Expression Profile Distinct from Other Viruses but Similar to Hemophagocytic Syndromes
Source: PLoS One. 2014 Jan 17;9(1):e85422. doi: 10.1371/journal.pone.0085422 (PMC3894977; doi:10.1371/journal.pone.0085422)
Supplement: Table S3 — Genes with a fold change ≥3. (DOCX) [file pone.0085422.s007.docx]

**Table S3. (Supplementary to Figure 3) Genes with a fold change ≥ 3**

| **Group** | **Gene Symbol** | **Common and/or Official Name** |
| --- | --- | --- |
| EBV unique | CHI3L2 | YKL-39 or chitinase 3-like 2 |
| CD8A | CD8 |
| GZMH | granzyme H |
| In common with DENV | CD38 | CD38 |
| LMNB1 | lamin B1 |
| APOBEC3G | apolipoprotein B mRNA editing enzyme, catalytic polypeptide-like 3G |
| IDH2 | isocitrate dehydrogenase 2 (NADP+), mitochondrial |
| LAG3 | lymphocyte-activation gene 3 |
| MT1E | metallothionein 1E |
| E2F2 | E2F transcription factor 2 |
| CKS2 | CDC28 protein kinase regulatory subunit 2 |
| ASF1B | ASF1 anti-silencing function 1 homolog B or CIA-II |
| ACOT7 | BACH or acyl-CoA thioesterase 7 |
| MCM6 | minichromosome maintenance complex component 6 |
| C18orf56 | chromosome 18 open reading frame 56 |
| CCNB2 | cyclin B2 |
| CDT1 | chromatin licensing and DNA replication factor 1 |
| EXO1 | exonuclease 1 |
| AURKB | aurora kinase B |
| BUB1 | budding uninhibited by benzimidazoles 1 |
| CCNF | cyclin F or FBX1 |
| KIFC1 | kinesin family member C1 |
| TIMD4 | TIM4 or T-cell immunoglobulin and mucin domain containing 4 |
| CDCA7 | JPO1 or cell division cycle associated 7 |
| MND1 | meiotic nuclear divisions 1 homolog |
| SLC27A2 | solute carrier family 27 (fatty acid transporter), member 2 |
| GINS2 | GINS complex subunit 2 |
| KIAA0101 | PAF, PAF15, p15PAF, or p15(PAF) |
| TYMS | TS or thymidylate synthetase |
| STMN1 | stathmin 1 |
| PCNA | proliferating cell nuclear antigen |
| GMNN | geminin, DNA replication inhibitor |
| ATAD2 | ANCCA or ATPase family, AAA domain containing 2 |
| CENPN | centromere protein N |
| CDC20 | cell division cycle 20 homolog |
| CDCA3 | cell division cycle associated 3 |
| TPX2 | microtubule-associated, homolog |
| AURKA | aurora A or aurora kinase A |
| KIF14 | kinesin family member 14 |
| HJURP | Holliday junction recognition protein |
| FANCI | Fanconi anemia, complementation group I |
| CDCA8 | BOREALIN or cell division cycle associated 8 |
| BIRC5 | baculoviral IAP repeat containing 5 |
| CKAP2L | cytoskeleton associated protein 2-like |
| CDCA2 | Repo-Man or cell division cycle associated 2 |
| KIF2C | MCAK |
| POLQ | polymerase (DNA directed), theta |
| CDC45L | cell division cycle 45 homolog |
| CDCA5 | SORORIN or cell division cycle associated 5 |
| UBE2C | ubiquitin-conjugating enzyme E2C |
| MCM2 | minichromosome maintenance complex component 2 |
| TK1 | thymidine kinase 1, soluble |
| CCNA2 | cyclin A2 |
| ASPM | asp (abnormal spindle) homolog, microcephaly associated |
| APOBEC3H | apolipoprotein B mRNA editing enzyme, catalytic polypeptide-like 3H |
| SPC24 | NDC80 kinetochore complex component, homolog |
| CDC2 | CDK1 or cyclin-dependent kinase 1 |
| HMMR | RHAMM or hyaluronan-mediated motility receptor |
| MCM10 | minichromosome maintenance complex component 10 |
| OIP5 | LINT-25 |
| C12orf48 | PARPBP or PARI |
| WDR51A | POC1A or PIX2 |
| MCM4 | minichromosome maintenance complex component 4 |
| PLK4 | polo-like kinase 4 or SAK |
| NUSAP1 | nucleolar and spindle associated protein 1 |
| TOP2A | topoisomerase (DNA) II alpha |
| CENPA | centromere protein A |
| CHEK1 | checkpoint kinase 1 or CHK1 |
| STIL | SCL/TAL1 interrupting locus or SIL |
| CENPM | centromere protein M |
| CDKN3 | cyclin-dependent kinase inhibitor 3 or KAP1 |
| NCAPG | non-SMC condensin I complex, subunit G |
| PTTG3 | PTTG3P or pituitary tumor-transforming 3, pseudogene |
| TTK | MPS1 |
| FEN1 | flap structure-specific endonuclease 1 |
| PTTG1 | pituitary tumor-transforming 1 |
| MELK | maternal embryonic leucine zipper kinase |
| DLG7 | HURP or DLGAP5 |
| KIF11 | EG5 |
| KIF15 | HKLP2 |
| CEP55 | centrosomal protein 55kDa |
| KIF20A | MKLP2 |
| UBE2T | ubiquitin-conjugating enzyme E2T |
| POLE2 | polymerase (DNA directed), epsilon 2, accessory subunit |
| TRIP13 | thyroid hormone receptor interactor 13 |
| PSAT1 | phosphoserine aminotransferase 1 |
| PHGDH | phosphoglycerate dehydrogenase |
| PRC1 | protein regulator of cytokinesis 1 |
| RAD51AP1 | RAD51 associated protein 1 |
| RFC4 | replication factor C (activator 1) 4 |
| IFNG | interferon, gamma |
| TUBA1C | tubulin, alpha 1c |
| Common | C1QB | complement component 1, q subcomponent, B chain |
| IFI27 | interferon, alpha-inducible protein 27 |
| ANKRD22 | ankyrin repeat domain 22 |
| CXCL10 | IP-10 |
| GBP4 | guanylate binding protein 4 |
| GBP5 | guanylate binding protein 5 |
| GBP1 | guanylate binding protein 1, interferon-inducible |
| STAT1 | signal transducer and activator of transcription 1 |
| MT2A | metallothionein 2A |
| OASL | 2'-5'-oligoadenylate synthetase-like |
| PSMB9 | proteasome (prosome, macropain) subunit, beta type, 9 |
| Down in Some | IER3 | IEX1 or immediate early response gene 3 |
| G0S2 | G0/G1switch 2 |
| CXCL2 | MIP-2 |
| IL1B | interleukin – 1beta |
| IL8 | interleukin - 8 |
| PTGS2 | COX2 |
| HBEGF | heparin-binding EGF-like growth factor |
| OSM | oncostatin M |
| IRS2 | insulin receptor substrate 2 |
| SGK | serum/glucocorticoid regulated kinase 1 |
| SDPR | serum deprivation response |
